# Differential Expression of the Enzymatic System Controlling Synthesis, Metabolism, and Transport of PGF2 Alpha in Human Fetal Membranes<sup>1</sup>

Michelle Breuiller-Fouché,<sup>3,6</sup> Marie-Josèphe Leroy,<sup>3</sup> Olivier Dubois,<sup>4,6</sup> Pierrette Reinaud,<sup>4,6</sup>  
Audrey Chissey,<sup>3,6</sup> Hong Qi,<sup>5</sup> Guy Germain,<sup>4,6</sup> Michel A. Fortier,<sup>7</sup> and Gilles Charpigny<sup>2,4,6</sup>

INSERM,<sup>3</sup> U767, Faculté des Sciences Pharmaceutiques et Biologiques, Université René Descartes, Paris, France  
INRA,<sup>4</sup> UMR-1198 Biologie du développement et Reproduction, Jouy en Josas, France  
Department of Pharmacology,<sup>5</sup> Shangai Jiatong University of Medicine, Shangai, China  
PremUp,<sup>6</sup> Paris, France  
Département d'Obstétrique et de Gynécologie,<sup>7</sup> Université Laval, Québec, Québec, Canada

## ABSTRACT

The present study investigated the expression of genes and proteins associated with PGF2alpha biosynthesis, catabolism, and transport in matched amnion and choriodecidua of human term placenta. The concentration of PGF2alpha within fetal membranes depends on the balance between complex enzymatic systems responsible for, respectively, its synthesis—by prostaglandin-endoperoxide synthase 2 (PTGS2) and members of the aldo-keto reductase (AKR) family, AKR1C3 and AKR1B1—and its catabolic inactivation—through hydroxy-prostaglandin-dehydrogenase (HPGD). We observed that AKR1C3 shows equal basal expression (mRNA and protein) in choriodecidua and amnion but that AKR1B1 exhibits preferential expression in the choriodecidua. Expression of HPGD and solute carrier organic anion transporter family member 2A1 (SLCO2A1) was found primarily in the choriodecidua. We also evaluated whether an inflammatory environment induced by the gram-negative bacterial endotoxin lipopolysaccharide (LPS) affects expression of each candidate enzymes. The amnion responded to LPS with a small but significant decrease of AKR1B1 mRNA expression. In contrast, we found a significant increase in PTGS2 and AKR1C3 mRNA expression in choriodecidua after LPS challenge, but such regulation was confirmed only at protein levels for PTGS2 and not for AKR1C3. Our results suggest that the choriodecidua appears to be the main tissue, which expresses maximally all the components (synthesis, degradation, and transport) controlling PGF2alpha levels.

AKR1B1, AKR1C3, aldo-keto reductases, fetal membranes, human parturition, parturition, placenta, pregnancy, prostaglandin-F<sub>2α</sub>, prostaglandin transporter, SLCO2A1

## INTRODUCTION

Parturition encompasses composite physiological processes that require synchronization of uterine contractions, cervical dilatation, and rupture of fetal membranes. The control of onset of labor in women is as yet unknown because of the multiplicity of factors involved (hormonal, mechanical,

genetic, and/or environmental). During the past decade, growing evidence has demonstrated a link between intrauterine infection/inflammation and spontaneous preterm labor/delivery [1–5]. Extensive data from the literature have reported that the cytokine-mediated inflammatory process is directly involved in the release of uterotonic agents such as prostaglandin (PG) leading to the rupture of fetal membranes. The fetal membranes (amnion and choriodecidua) are major sources of prostaglandins [6–9]. Numerous in vitro studies have shown that proinflammatory cytokines and bacterial endotoxin stimulate PG production from human term fetal membranes [10–13]. It is well established that the net production of PGs within the placenta and fetal membranes depends on the balance between complex enzymatic systems responsible, respectively, for their synthesis by prostaglandin-endoperoxide synthases, the constitutively expressed PTGS1, and the inducible PTGS2 (also known as cyclooxygenase, COX-1, and COX-2, respectively) [14] and by various terminal PG synthase (such as PGE and PGF synthase responsible for the selective production of PGE2 and PGF2α) on the one hand and for their metabolism/catabolism by the 15-hydroxy prostaglandin dehydrogenase (HPGD) enzyme on the other [15–19]. Previous studies have shown that human fetal membranes expressed various prostaglandin E synthases (PTGES1, also known as microsomal PGE synthase-1; PTGES2, also known as microsomal PGE synthase-2; and PTGES3, also known as cytosolic PGE synthase-3) [20, 21]. Labor has little if any effect on the expression of PTGES, but proinflammatory cytokines and bacterial endotoxin increase the activity of PTGS2 and reduce the activity of HPGD in the fetal membranes, thereby resulting in a net increase of PGE2 production [22]. But compelling evidence also supports a role for PGF2α in human labor. PGF2α concentration increases in amniotic fluid before the onset of spontaneous labor at term [23]. Moreover, a significant rise in PGF2α happens in the amniotic fluid during early labor [24] as well as in amniotic fluid of women with intra-amniotic infection associated to preterm labor [12]. This prostaglandin is known to increase its local concentration at the time of parturition and to induce myometrial contractions and cervical dilatation [6]. PGF2α can be mostly produced through reduction of PGH2 by 9,11-endoperoxide reductase. In humans, the aldo-keto reductase family 1, member C3 (AKR1C3), plays an important role in biosynthesis of PGs, catalyzing the formation of PGF2α and 9α-, 11β-PGF2α from PGH2, and PGD2, respectively [25]. More recently, a new enzyme responsible for PGF2α synthesis, the AKR1B5, has been described in bovine endometrium [26], and the AKR1B1 (the homolog of AKR1B5 in human) was found to be expressed and functional in the human endometrium [27, 28].

<sup>1</sup>Supported by the European Preterm Labour Group.

<sup>2</sup>Correspondence: Gilles Charpigny, INRA, UMR 1198 Biologie du Développement et Reproduction, F-78350 Jouy en Josas, France. FAX: 33 134 65 2364; e-mail: Gilles.Charpigny@jouy.inra.fr

Received: 22 July 2009.

First decision: 7 September 2009.

Accepted: 24 March 2010.

© 2010 by the Society for the Study of Reproduction, Inc.

eISSN: 1529-7268 <http://www.biolreprod.org>

ISSN: 0006-3363

TABLE 1. Primer pair sequences and Genbank accession numbers for real-time quantitative RT-PCR study.

| Gene name      | Genbank accession no. | Amplicon<br>(size in base pair) | Oligonucleotide primer (5' → 3')              |
|----------------|-----------------------|---------------------------------|-----------------------------------------------|
| <i>PTGS2</i>   | NM_000963             | 101                             | ATCATAAGCGAGGGCCAGCT<br>AAGGCGCAGTTTACGCTGTC  |
| <i>AKR1B1</i>  | NM_001628             | 201                             | GATCGCAGCCAAGCACAATA<br>CTCAACAAGGCACAGACCCTC |
| <i>AKR1C3</i>  | NM_003739             | 500                             | GTAAGCTTTGGAGGTCAC<br>CACCCATCGTTTGTCTCG      |
| <i>SLCO2A1</i> | NM_005630             | 101                             | CTTCCACCCGGTCTGTGGAG<br>TCAGTTGCTTGGAGGTTGCA  |
| <i>HPGD</i>    | NM_000860             | 171                             | AAGCAAATGGAGGTGAAGGC<br>TGGCATTCAGTCTCACACCAC |
| <i>GAPDH</i>   | NM_002046             | 380                             | GGAGAAGCTGGGGC<br>GATGGCATGGACTGTGG           |

According to these new findings, whether human fetal membranes express such enzyme family remains unknown.

An additional level of regulation of PGs action at the cellular level involving PG transporters has recently been demonstrated. Because PGs predominate as charged anions, they cross cell membranes not by passive diffusion but rather through specialized carriers such as solute carrier organic anion transporter family member 2A1 (*SLCO2A1*) [29]. *SLCO2A1* was initially postulated to mediate influx of PGs from the extracellular milieu for their cellular inactivation and more recently for transit of newly synthesized PGs to exert their biological actions in the bovine uterus and fetal membranes (amnion, chorion, and chorioallantois) [30, 31]. Although *SLCO2A1* has emerged as a functional PG carrier in the human endometrium throughout the menstrual cycle and in decidualized endometrial stroma cells [30, 32, 33], its characterization in human fetal membranes and its precise role in parturition are still poorly understood.

The present study focused on the analysis of the complex enzymatic systems controlling *PGF2 $\alpha$*  level in matched amnion and choriodecidua of human term placenta. The objectives were 1) to determine the cellular localization of *PTGS2*, *AKR* family members (*AKR1C3*, *AKR1B1*), *HPGD*, and *SLCO2A1* protein expression in fetal membranes using immunohistochemistry (IHC); 2) to determine *PTGS2*, *AKR1B1*, *AKR1C3*, *HPGD*, and *SLCO2A1* mRNA expression in amnion and choriodecidua and to compare them with changes in protein levels; and 3) to evaluate whether an inflammatory environment induced by the Gram-negative bacterial endotoxin lipopolysaccharide (LPS) can affect the expression of each enzyme candidates.

## MATERIALS AND METHODS

### Materials

Monoclonal anti-*AKR1C3* antibody was purchased from Sigma-Aldrich, polyclonal anti-*HPGD* antibody was from Cayman Chemical (Spibio, Montigny le Bretonneux, France), and polyclonal anti-*PTGS2* and anti-*GAPDH* antibodies were purchased from Santa Cruz Biotechnology (TEBU-BIO S.A., Le Perray en Yvelines, France). Monoclonal anti-vimentin (*VIM*) and monoclonal anti-cytokeratin 7 (*KRT7*) were purchased from DAKO FRANCE (Trappes, France). Polyclonal anti-*AKR1B1* and anti-*SLCO2A1* antibodies were contributed by M.A. Fortier and characterized previously [32, 33].

### Biological Samples

Placentas were collected from eight pregnant women delivered by elective caesarean section prior to the onset of labor (38th and 40th weeks of pregnancy) because of a diagnosed cephalo-pelvic disproportion in an apparently normal singleton pregnancy. This study was approved by the Comité Consultatif de

Protection des Personnes pour la Recherche Biomédicale (Paris-Cochin, France), and informed consent was obtained from all donors. Fetal membranes were dissected free of the placenta under sterile conditions and washed with phosphate-buffered saline (PBS) in order to eliminate blood clots.

The amnion and chorion with adherent decidua were manually separated and cut into 1-cm<sup>2</sup> pieces. Explants were pooled and randomly distributed into 24-well plates (two explants per well, two wells per treatment) containing 2 ml of Dubelco modified Eagle medium supplemented with 10% fetal calf serum, 100 UI/ml of penicillin, and 100  $\mu$ g/ml of streptomycin (Invitrogen SARL Life Technologies, Cergy-Pontoise, France). The explants were incubated under 5% CO<sub>2</sub> and 95% air at 37°C for 48 h to allow them to stabilize. The explants were incubated either without (basal) or with 10  $\mu$ g/ml lipopolysaccharide from *Escherichia coli* 127:B8 (LPS) (Sigma-Aldrich, Saint Quentin Fallavier, France) for the indicated times in serum-free medium as previously described [34]. At the end of the incubation period, the explants of each well were pooled, weighed, and immediately frozen in liquid nitrogen before storing at -80°C for subsequent processing for either total RNA or protein extraction.

### Immunohistochemistry

Immediately after the cesarean section, full-thickness fetal membranes from four term placentas were fixed in 4% formalin for 4 h at room temperature and then embedded in paraffin. Tissue sections of 5  $\mu$ m were mounted on slides and dewaxed in xylene and rehydrated in ethanol/water. Immunostaining was performed with a universal streptavidin-peroxidase immunostaining kit (DAKO FRANCE). Nonspecific binding was blocked by incubation of tissue sections for 5 min in a blocking reagent containing 3% hydrogen peroxide and then in 3% serum albumin bovine in PBS buffer for 30 min. The sections were incubated with antibodies directed against *AKR1B1* (1/100), *AKR1C3* (1/100), *PTGS2* (1/500), *SLCO2A1* (1/500), *HPGD* (1/100), *VIM* (1/200), and *KRT7* (1/200) for 30 min at room temperature. Sections were washed in PBS and incubated with a biotinylated secondary antibody for 15 min. They were then washed three times in PBS and incubated with streptavidin conjugated to horseradish peroxidase for 15 min. The sections were washed in PBS, and staining was detected by incubation for 2 min with the DAB (3, 3'-diaminobenzidine) chromogen. Controls were performed by incubating the sections with nonspecific rabbit or mouse purified IgG at the same concentration as the primary antibody. Preparations were counterstained with hematoxylin blue and mounted in an aqueous mounting medium (Ultramount Permanent Mounting Medium, Aqueous, DAKO FRANCE), then examined and photographed with an Olympus BX60 microscope.

### Western Blot Analysis

Whole homogenates were prepared from amnion and choriodecidua explants treated as indicated. Tissues were homogenized (400 mg/ml) with an Ultra-Turrax apparatus (IKA-WERKE, VWR, Strasbourg, France) in ice-cold homogenization buffer containing 100 mM Tris HCl, pH 7.4, 2 mM MgSO<sub>4</sub>, 2 mM EDTA, 10% glycerol, and the protease inhibitor cocktail (P-2714) (Sigma-Aldrich). Protein concentration was determined by the method of Bradford, using bovine serum albumin as standard. Equal amounts of proteins were loaded and separated by SDS-PAGE on 10% or 12% gels and transferred onto a Hybond-P membrane. Nonspecific binding sites were blocked by incubating the membranes with 5% low-fat dried milk in Tris Buffer Saline Tween (TBST) (10 mM Tris HCl, pH 7.5, 0.15 M NaCl, 0.1% Tween 20). The membranes were then incubated overnight at 4°C in TBST/1% milk with the indicated antibodies at the appropriate concentrations: *AKR1B1* (1/3000),

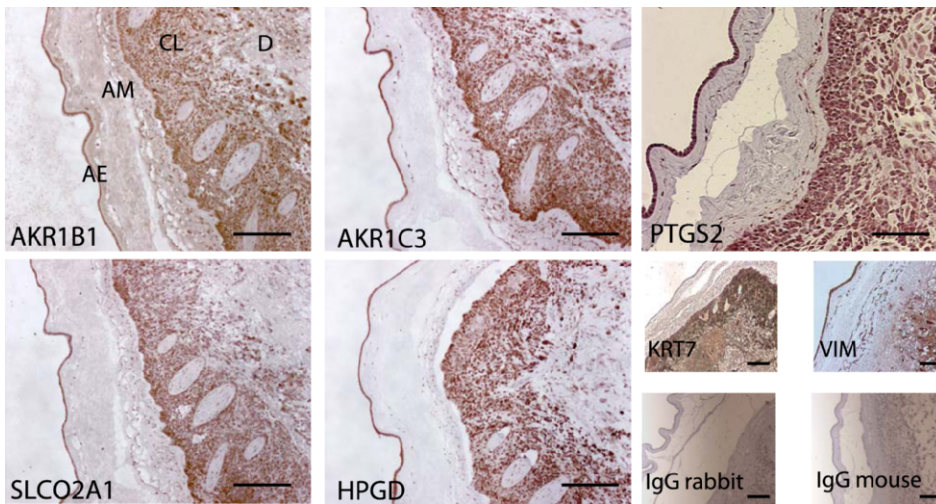

FIG. 1. Immunolocalization of PTGS2, AKR1B1, AKR1C3, SLCO2A1, and HPGD in human fetal membranes. Immunohistochemistry was performed on serial sections of fetal membranes. Tissue-positive controls were conducted with cytokeratin 7 (KRT7) and vimentin (VIM) antibodies, and negative controls were performed with nonimmune rabbit or mouse IgG. AE, amniotic epithelium; AM, amniotic mesenchymal layer; CL, chorionic layer; D, decidual cells. Bar = 100  $\mu$ m.

AKR1C3 (1/500), PTGS2 (1/1000), SLCO2A1 (1/5000), or HPGD (1/200). Membranes were washed with TBST and incubated with either donkey anti-rabbit or anti-mouse secondary antibody conjugated with horseradish peroxidase. The blots were developed with ECL+ reagents and visualized on Kodak X-ray films (GE Healthcare Bio-sciences, Orsay, France). Molecular-weight markers were run in parallel.

For standardization, the membranes were stripped with a buffer containing 62.5 mM Tris (pH 6.2), 2% sodium dodecyl sulfate, and 100 mM  $\beta$ -mercaptoethanol at 50°C for 30 min and reprobed with a polyclonal antibody raised against glyceraldehyde-3-phosphate dehydrogenase (GAPDH) (1/1000). Densitometry analysis was performed using a FUJIFILM LAS-1000 Camera System and analyzed by Advanced Image Data Analysis software (Raytest, Courbevoie, France).

**RNA preparation.** Total RNA was extracted from amnion and choriodecidua explants using the TRIZOL reagent method (Invitrogen SARL) as previously described [35]. Briefly, explants were homogenized in TRIZOL reagent, and total RNA was recovered by phenol/chloroform extraction, isopropanol precipitation and ethanol washes, according to the manufacturer's instructions. Total RNA was quantified by spectrophotometry, and RNA integrity was verified by nondenaturing agarose gel electrophoresis.

**Synthesis of human cDNA for AKR1B1, AKR1C3, SLCO2A1, HPGD, PTGS2, and GAPDH.** Reverse transcription was performed on 1  $\mu$ g of total

RNA extracted from placental membranes at 37°C with oligo(dT) primer and M-MLV reverse transcriptase (Invitrogen). Reaction mixture for polymerase chain reaction (PCR), including Taq polymerase (QBiogene, MP BIOMEDICALS, Illkirch, France), was prepared as suggested by the manufacturer. Primers were designed using the Primer Selection program from GCG (Genetics Computer Group). The identity of all PCR products was confirmed by DNA sequencing (COGENICS, Meylan, France), and sequence homology analysis was verified using the Basic Local Alignment Search Tool [36]. These fragments were used to design real-time PCR primers and to quantify templates for the real-time PCR standard curves.

#### Real-Time PCR Analysis

Four independent fetal membranes were analyzed in duplicate. Before doing real-time PCR, the samples were checked for any DNA contamination by performing PCR reactions done without reverse transcription of the RNA extracts. For each transcript to study, real-time PCR was carried out using the real time Applied 7000 PCR system (Applied Biosystems, Courtabouef, France) with 5% of the retrotranscribed product (equivalent to 50 ng of RNA) and 300 nM of gene-specific oligonucleotide pairs, in a total volume of 25  $\mu$ l of reagent SYBR Green PCR Mastermix (Applied Biosystems). Primers (Table 1) were designed using Primer Express software (Applied Biosystems). Real-time PCR

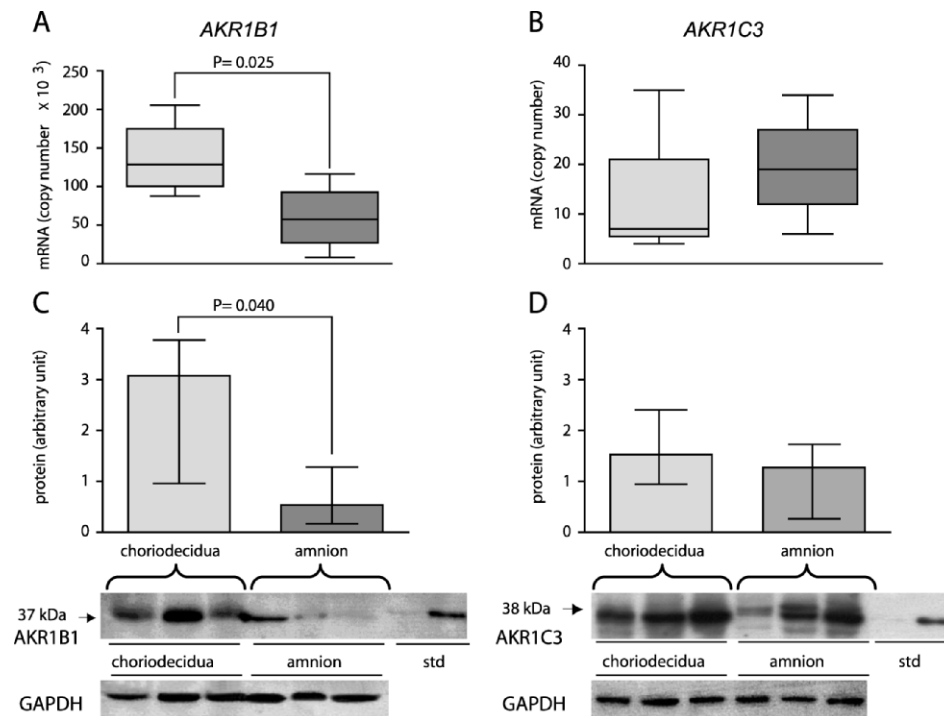

FIG. 2. Expression of AKR1B1 and AKR1C3 in matched amnion and choriodecidua. Quantification of AKR1B1 (A) and AKR1C3 (B) mRNA was performed by real-time PCR. Data, expressed as the copy number, are represented as box plot showing median and 25th and 75th percentiles, the minimum and the maximum data values of four samples measured in duplicate. Protein expression was analyzed by Western blotting (C and D) on homogenates of three matched amnion and choriodecidua explants and with recombinant AKR1B1 (C) or AKR1C3 (D) proteins used as positive control (std). The detection of GAPDH in each sample served as a loading control. Representative experiments are shown with three different matched amnion and choriodecidua membranes. Densitometric quantification of bands represents median (top of columns), and the highest and lowest values (bars) of three samples were analyzed four times. There is a statistically significant difference between choriodecidua and amnion both at mRNA and at protein levels for AKR1B1 but not for AKR1C3.



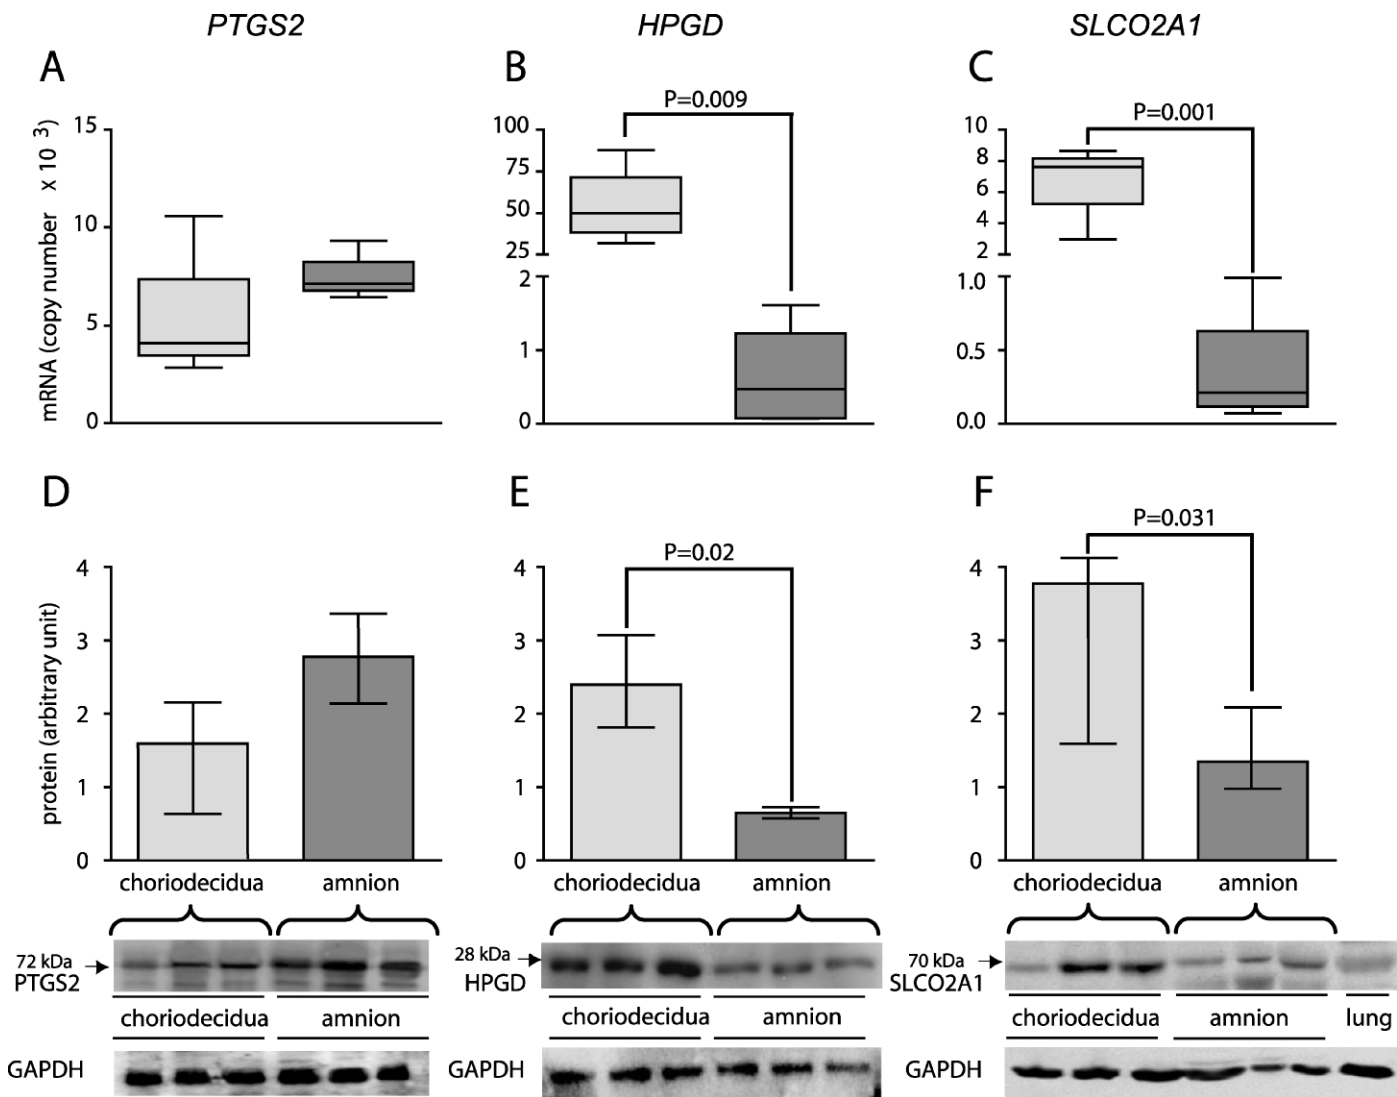

FIG. 3. Expression of *PTGS2*, *HPGD*, and *SLCO2A1* in matched amnion and choriodecidua. Quantification of *PTGS2*, *HPGD*, and *SLCO2A1* mRNA was performed by real-time PCR (A–C). Data, expressed as the copy number, are represented as box plot showing median and 25th and 75th percentiles, the minimum and the maximum data values of four samples measured in duplicate. Protein expression was also analyzed by Western blotting (D–F) on homogenates of three matched amnion and choriodecidua explants and with a homogenate of rat lung used as positive control. The detection of GAPDH in each sample served as a loading control. Representative experiments are shown with three different matched amnion and choriodecidua membranes. Densitometric quantification of bands represents median (top of columns), and the highest and lowest values (bars) of three samples were analyzed four times. There is a statistically significant difference between choriodecidua and amnion both at mRNA and protein levels for *HPGD* and *SLCO2A1*.

conditions were 2 min at 50°C and 15 min at 95°C, followed by 45 cycles of 15 sec at 95°C and 1 min at 60°C. Standard curves were generated in parallel using serial dilutions of the purified PCR product as a polymerase template. The presence of a specific and unique PCR product was verified by an ABI prism-generated melting curve profile. Quantification of targets was calculated from their respective standard curves and was expressed as number of RNA copies per 50 ng total retrotranscribed RNA. No significant difference of expression for GAPDH was detected (analysis of variance [ANOVA],  $P < 0.05$ ) between the different tissues (amnion, choriodecidua) and in the presence or absence of LPS.

#### Statistical Analysis

For transcript analysis, statistical significance was determined using log transform data and two-way ANOVA. ANOVA was followed by post hoc tests using the SYSTAT software (GMBH, Erkrath, Germany). Values at  $P < 0.05$  were considered statistically significant. Data are represented as box-and-whiskers graphs. The boxes extend from the 25th percentile to the 75th percentile with a line at the median. The whiskers extend above and below the box to show the highest and lowest values. For Western blot data regarding

protein expression in amnion and choriodecidua membranes, there were only three replicates so that values are graphed as the median (top of columns) and the highest and lowest values (bars). The effect of LPS on protein expression in explants of fetal membranes was assessed by ANOVA, and the bar graphs represent the mean  $\pm$  SEM.

## RESULTS

### *Immunolocalization of AKR1C3, AKR1B1, SLCO2A1, PTGS2, and HPGD in the Human Fetal Membranes*

Chorionic trophoblast and amniotic epithelium were evidenced using cytokeratin-7 (KRT7), whereas vimentin (VIM) was used to identify the mesenchymal layer of the amnion and decidual stromal cells (Fig. 1). Positive immunostaining for AKR1B1 and AKR1C3 was found mainly in trophoblast cell layer of the chorion leave and in the decidual stromal cells and faintly in the amniotic epithelium, while a poor staining was detectable in cells of the mesenchymal layer

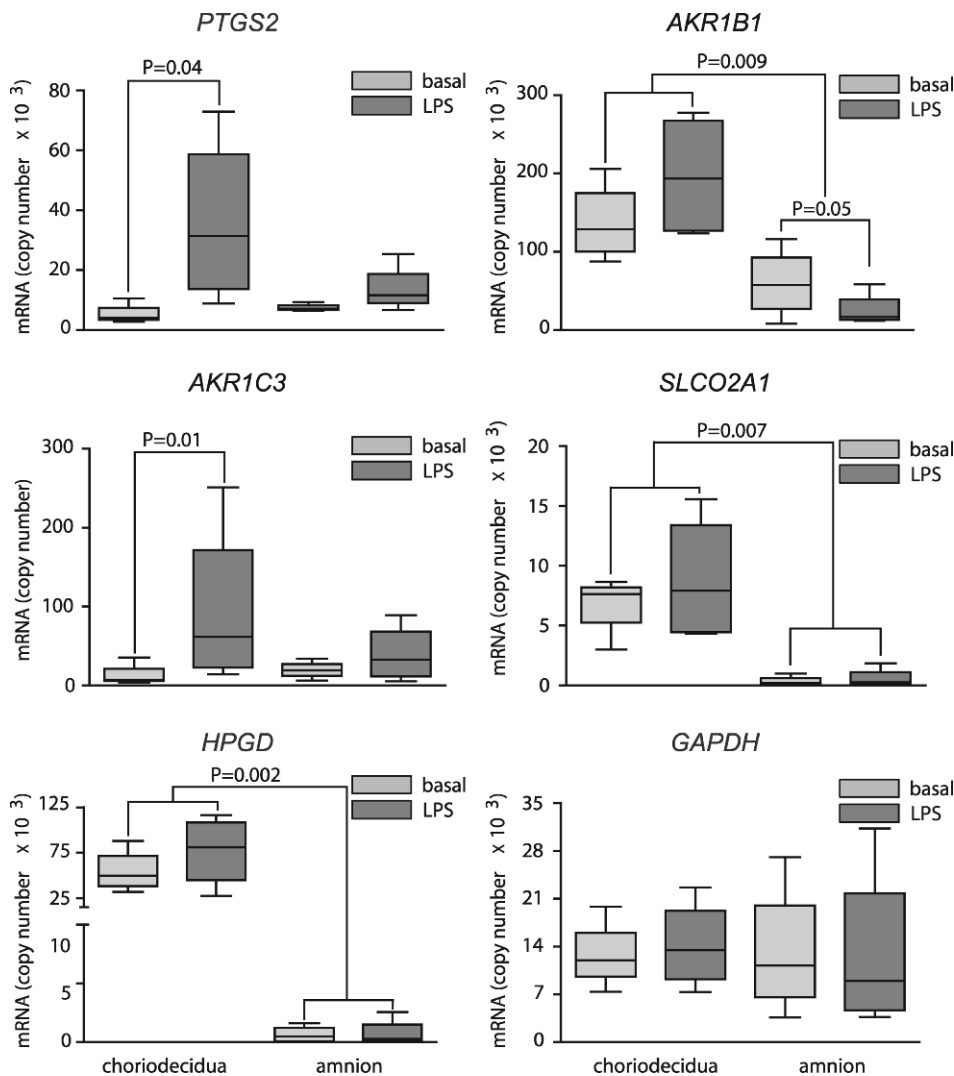

FIG. 4. Effect of LPS on *PTGS2*, *AKR1B1*, *AKR1C3*, *SLCO2A1*, and *HPGD* expression in amnion and choriodecidua. The effect of 4 h of LPS treatment (10  $\mu$ g/ml) was determined on *PTGS2*, *AKR1B1*, *AKR1C3*, *SLCO2A1*, *HPGD*, and *GAPDH* mRNA expression by real-time PCR. Data are expressed as copy number mRNA and are represented as box plot showing median and 25th and 75th percentiles, the minimum and the maximum data values of four independent samples measured in duplicate. In choriodecidua, there is a statistically significant difference between basal and LPS-stimulated treatment for *PTGS2* and *AKR1C3* but not for *AKR1B1*, *SLCO2A1*, *HPGD*, and *GAPDH*. In amnion, there is a significant effect of LPS only on *AKR1B1*. Significant differences between choriodecidua and amnion are evidenced for *HPGD*, *AKR1B1*, and *SLCO2A1*.

of the amnion. A similar pattern of staining was observed for immunoreactive *SLCO2A1* and *HPGD*. We observed an intense staining for *PTGS2* mainly in amnion epithelial cells as well as in chorionic trophoblastic and decidual cells. By contrast, a moderate immunostaining of *PTGS2* was present in amnion mesenchymal cells. The immunostaining was abolished when nonimmune serum was substituted for the primary antibody.

#### Expression of *AKR1B1* and *AKR1C3* in Amnion and Choriodecidua

Expression of *AKR1B1* and *AKR1C3* was analyzed by quantitative RT-PCR and Western blotting in matched amnion and choriodecidua samples (Fig. 2). In both components of fetal membranes, we detected a high mRNA copy number of *AKR1B1* instead of a low mRNA copy number of *AKR1C3*. Contrasting patterns for *AKR1B1* expression were observed between amnion and choriodecidua. The choriodecidua exhibited significantly more *AKR1B1* expression than the amnion (Fig. 2A). This difference was confirmed at the protein level as indicated after integration of the immunoreactive band for *AKR1B1* (Fig. 2C). Messenger RNA expression and protein levels of *AKR1C3* in amnion and choriodecidua were equivalent (Fig. 2, B and D).

#### Expression of *PTGS2*, *HPGD*, and *SLCO2A1* in Amnion and Choriodecidua

As shown in Figure 3, A and D, comparable levels of expression of *PTGS2* (mRNA and protein) were observed in amnion and choriodecidua. The levels of expression of *HPGD* mRNA (Fig. 3B) and *SLCO2A1* mRNA (Fig. 3C) were significantly higher in choriodecidua than in amnion. These differential expressions were confirmed at the protein level by Western blotting, where the integrated signal for the immunoreactive band at 70 kDa corresponding to *SLCO2A1* protein (Fig. 3F) and the immunoreactive band at 28 kDa corresponding to *HPGD* (Fig. 3E) were significantly more intense in the homogenates of choriodecidua than in amnion samples.

#### Effect of LPS on *PTGS2*, *AKR1B1*, *AKR1C3*, *SLCO2A1*, and *HPGD* Expression

The effect of LPS on *PTGS2*, *AKR1B1*, *AKR1C3*, *SLCO2A1*, and *HPGD* mRNA expression is presented in Figure 4 with LPS for 4 h. In choriodecidua explants, we found that treatment with LPS increased significantly *PTGS2* and *AKR1C3* mRNA expression. LPS treatment had no significant effect on *AKR1B1*, *SLCO2A1*, or *HPGD* mRNA expression. It has to be noted that *AKR1B1*, *SLCO2A1*, and *HPGD* are significantly expressed at a higher level in choriodecidua than

FIG. 5. Effect of LPS on PTGS2, AKR1B1, AKR1C3, SLCO2A1, and HPGD expression in amnion and choriodecidua explants. The effect of LPS treatment (10  $\mu\text{g/ml}$ ) was determined on PTGS2, AKR1B1, AKR1C3, SLCO2A1, and HPGD proteins analyzed by Western blot. Data are expressed as mean  $\pm$  SEM of the quantified densitometry signals. LPS treatment increases PTGS2 protein in choriodecidua ( $P = 0.050$ ) but not in amnion ( $P = 0.754$ ). LPS had no effect on other protein in both choriodecidua and amnion membranes (AKR1C3 [ $P = 0.376$ ;  $P = 0.917$ ], AKR1B1 [ $P = 0.148$ ;  $P = 0.108$ ], SLCO2A1 [ $P = 0.662$ ;  $P = 0.405$ ], HPGD [ $P = 0.755$ ;  $P = 0.712$ ]).

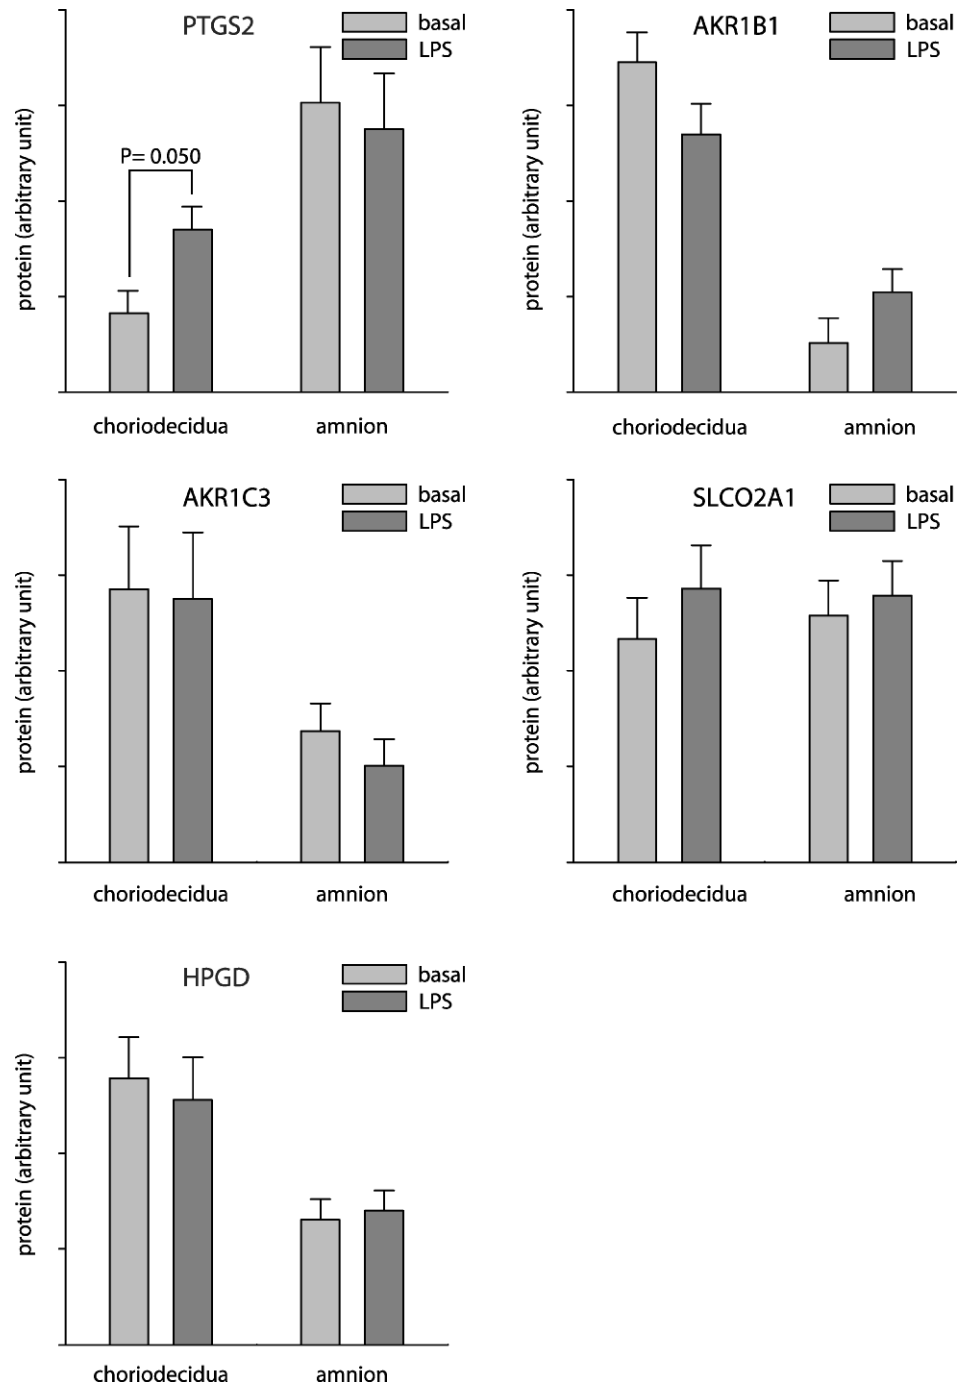

in amnion. In amnion explants, the only significant change after LPS treatment was a decrease in *AKR1B1* mRNA expression. Amnion and choriodecidua explants were then incubated with or without 10  $\mu\text{g/ml}$  LPS for 24 h, and the protein expression of PTGS2, AKR1B1, AKR1C3, SLCO2A1, and HPGD was evaluated (Fig. 5). LPS treatment had no significant effect on AKR1B1, AKR1C3, SLCO2A1, and HPGD protein expression. LPS increased PTGS2 protein ( $P = 0.050$ ) only in choriodecidua. As indicated in Figure 4, this result correlates to the increase of *PTGS2* mRNA. By contrast, the LPS-induced increase of *AKR1C3* mRNA did not parallel an increase of the *AKR1C3* protein in the choriodecidua explants.

## DISCUSSION

In the present study, we examined in amnion and choriodecidua, the expression of genes and proteins associated with  $\text{PGF2}\alpha$  biosynthesis, catabolism, and transport in an integrated manner, as a first attempt to understand the response of fetal membranes following LPS exposure to mimic inflammation. We have confirmed that the human fetal membranes possess all the committed steps necessary for autoregulation of  $\text{PGF2}\alpha$  action. Thus, both PTGS2 and HPGD are localized in human fetal membranes as previously reported [10, 15–19]. Our analysis of the relative expression of these enzymes demonstrates that amnion epithelial cells and chorionic trophoblastic cells displayed similar PTGS2 expres-

sion. In contrast, the chorion expressed predominantly HPGD. This regional distribution within the fetal membranes has previously been reported [15, 16]. Our present data focus attention on the role of the AKR family members [37]. PGF $2\alpha$  biosynthesis involves AKR1C3 and now AKR1B1, the homolog of AKR1B5, which has been previously shown to be most likely the relevant enzyme for the synthesis of luteolytic PGF $2\alpha$  in the bovine endometrium [26–28]. The present report indicates that AKR1B1 was expressed at higher levels than AKR1C3 in both fetal membranes. AKR1C3 showed equal expression (mRNA and protein levels) in choriodecidua and amnion, but the transcripts for *AKR1B1* were more abundant in choriodecidua than in amnion. This is consistent with the AKR1B1 protein expression and with the IHC localization of AKR1B1, which shows choriodecidual preference. AKR1B5, the bovine homolog of AKR1B1, was shown to have complementary actions in the bovine endometrium: generation of PGF $2\alpha$  and inactivation of progesterone [26]. As PGF $2\alpha$  and progesterone are produced by the chorion [38], we cannot exclude that AKR1B1 acts as a multifunctional enzyme in the fetal membranes.

The PG transporter (SLCO2A1) has been identified in human reproductive tissues [32, 33, 39]. It has been proposed that SLCO2A1 mediates both the efflux of newly synthesized PGs to exert their biological action through their cell surface G-protein coupled receptors and the influx of PGs from the extracellular milieu for their cellular inactivation. In the present study, SLCO2A1 is preferentially expressed in choriodecidua compared to amnion. SLCO2A1 protein expression follows that of mRNA, and cellular localization shows that SLCO2A1 protein is highly expressed in the choriodecidua. This is a logical site of expression given the documented role of chorion for PG inactivation during pregnancy [24]. Interestingly, the choriodecidua appears to be the main tissue, which expresses maximally all the components (synthesis, degradation, and transport) controlling PGF $2\alpha$  levels.

Growing evidence has demonstrated an association between intrauterine infection/inflammation and preterm birth [4, 5, 40]. Intra-amniotic or intrauterine injection of dead bacteria or bacterial products, including LPS, is sufficient to promote preterm labor in mouse, rabbit, and sheep [41]. Because PG production by fetal membranes is believed to be an important initiator of term and preterm labor, we expected changes in the expression of synthesis, metabolism, and transport of PGF $2\alpha$  in human choriodecidua and amnion following LPS-induced inflammatory environment.

A classical concept in humans is that choriodecidua appears as the first tissue colonized by microbial pathogens during an ascending intrauterine infection. Experimental evidence indicates that choriodecidua produces 10-fold-higher levels of proinflammatory cytokines than amnion [34, 42, 43]. The present study demonstrates that in amnion, inflammatory conditions have almost no effect on the gene expression of *PTGS2*, *AKR1C3*, *HPGD*, and *SLCO2A1*. In contrast, in choriodecidua, we demonstrated that LPS induced expression of *PTGS2* at mRNA and protein levels without altering expression of AKR1B1. An increase of *AKR1C3* mRNA levels was observed on LPS addition, but such regulation was not confirmed at the protein levels. The underlying cause of differential gene expression remains to be determined. It is also of note that expression level of HPGD is much more elevated in the choriodecidua compared to amnion, although we have not observed an inhibitory effect of LPS on this enzyme. The LPS has been previously reported to inhibit the activity of HPGD in the fetal membrane [11] and stimulated PGF $2\alpha$  release from the decidua and the intact fetal membrane [44,

45]. Interestingly, when chorion and decidua are separated, the chorionic production of prostaglandins always exceeds that of decidua, suggesting a potential paracrine inhibitory pathway between the two tissues [46]. Therefore, we cannot exclude that a similar mechanism may operate in vivo between choriodecidua and amnion. As quoted by others [15–17], the choriodecidua may act as a protective barrier for regulating the paracrine and the autocrine action of bioactive PGF $2\alpha$  until the time of spontaneous labor. Our data also support the idea that the choriodecidua is a major site for local control of enzymes of PGF $2\alpha$  biosynthesis and is more responsive than amnion to an inflammatory insult.

## ACKNOWLEDGMENT

The authors wish to thank Emmanuelle Dallot for her excellent technical support.

## REFERENCES

- Romero R, Espinoza J, Kusanovic JP, Gotsch F, Hassan S, Erez O, Chaiworapongsa T, Mazor M. The preterm parturition syndrome. *Bjog* 2006; 113(suppl 3):17–42.
- Christiaens I, Zaragoza DB, Guilbert L, Robertson SA, Mitchell BF, Olson DM. Inflammatory processes in preterm and term parturition. *J Reprod Immunol* 2008; 79:50–57.
- Vidaeff AC, Ramin SM. Potential biochemical events associated with initiation of labor. *Curr Med Chem* 2008; 15:614–619.
- Goldenberg RL, Hauth JC, Andrews WW. Intrauterine infection and preterm delivery. *N Engl J Med* 2000; 342:1500–1507.
- Kim MJ, Romero R, Gervasi MT, Kim JS, Yoo W, Lee DC, Mittal P, Erez O, Kusanovic JP, Hassan SS, Kim CJ. Widespread microbial invasion of the chorioamniotic membranes is a consequence and not a cause of intra-amniotic infection. *Lab Invest* 2009; 89:924–936.
- Khan AH, Carson RJ, Nelson SM. Prostaglandins in labor—a translational approach. *Front Biosci* 2008; 13:5794–5809.
- Olson DM. The role of prostaglandins in the initiation of parturition. *Best Pract Res Clin Obstet Gynaecol* 2003; 17:717–730.
- Keirse MJ, Turnbull AC. The fetal membranes as a possible source of amniotic fluid prostaglandins. *Br J Obstet Gynaecol* 1976; 83:146–151.
- Brown NL, Alvi SA, Elder MG, Bennett PR, Sullivan MH. A spontaneous induction of fetal membrane prostaglandin production precedes clinical labour. *J Endocrinol* 1998; 157:R1–R6.
- Bennett PR, Henderson DJ, Moore GE. Changes in expression of the cyclooxygenase gene in human fetal membranes and placenta with labor. *Am J Obstet Gynecol* 1992; 167:212–216.
- Brown NL, Alvi SA, Elder MG, Bennett PR, Sullivan MH. Interleukin-1 $\beta$  and bacterial endotoxin change the metabolism of prostaglandins E $2$  and F $2\alpha$  in intact term fetal membranes. *Placenta* 1998; 19:625–630.
- Romero R, Durum S, Dinarello CA, Oyarzun E, Hobbins JC, Mitchell MD. Interleukin-1 stimulates prostaglandin biosynthesis by human amnion. *Prostaglandins* 1989; 37:13–22.
- Rajasingam D, Bennett PR, Alvi SA, Elder MG, Sullivan MH. Stimulation of prostaglandin production from intact human fetal membranes by bacteria and bacterial products. *Placenta* 1998; 19:301–306.
- Smith WL, DeWitt DL, Garavito RM. Cyclooxygenases: structural, cellular, and molecular biology. *Annu Rev Biochem* 2000; 69:145–182.
- Cheung PY, Walton JC, Tai HH, Riley SC, Challis JR. Localization of 15-hydroxy prostaglandin dehydrogenase in human fetal membranes, decidua, and placenta during pregnancy. *Gynecol Obstet Invest* 1992; 33:142–146.
- Sangha RK, Walton JC, Ensor CM, Tai HH, Challis JR. Immunohistochemical localization, messenger ribonucleic acid abundance, and activity of 15-hydroxyprostaglandin dehydrogenase in placenta and fetal membranes during term and preterm labor. *J Clin Endocrinol Metab* 1994; 78:982–989.
- van Meir CA, Matthews SG, Keirse MJ, Ramirez MM, Bocking A, Challis JR. 15-Hydroxyprostaglandin dehydrogenase: implications in preterm labor with and without ascending infection. *J Clin Endocrinol Metab* 1997; 82:969–976.
- Giannoulas D, Haluska GJ, Gravett MG, Sadowsky DW, Challis JR, Novy MJ. Localization of prostaglandin H synthase, prostaglandin dehydrogenase, corticotropin releasing hormone and glucocorticoid receptor in rhesus monkey fetal membranes with labor and in the presence of infection. *Placenta* 2005; 26:289–297.



19. Casciani V, Marinoni E, Bocking AD, Moscarini M, Di Iorio R, Challis JR. Opposite effect of phorbol ester PMA on PTGS2 and PGDH mRNA expression in human chorion trophoblast cells. *Reprod Sci* 2008; 15:40–50.
20. Alfaidy N, Sun M, Challis JR, Gibb W. Expression of membrane prostaglandin E synthase in human placenta and fetal membranes and effect of labor. *Endocrine* 2003; 20:219–225.
21. Meadows JW, Eis AL, Brockman DE, Myatt L. Expression and localization of prostaglandin E synthase isoforms in human fetal membranes in term and preterm labor. *J Clin Endocrinol Metab* 2003; 88:433–439.
22. Premyslova M, Li W, Alfaidy N, Bocking AD, Campbell K, Gibb W, Challis JR. Differential expression and regulation of microsomal prostaglandin E(2) synthase in human fetal membranes and placenta with infection and in cultured trophoblast cells. *J Clin Endocrinol Metab* 2003; 88:6040–6047.
23. Lee SE, Romero R, Park IS, Seong HS, Park CW, Yoon BH. Amniotic fluid prostaglandin concentrations increase before the onset of spontaneous labor at term. *J Matern Fetal Neonatal Med* 2008; 21:89–94.
24. Challis JRG, Matthews SG, Gibb W, Lye SJ. Endocrine and paracrine regulation of birth at term and preterm. *Endocr Rev* 2000; 21:514–550.
25. Matsuura K, Shiraiishi H, Hara A, Sato K, Deyashiki Y, Ninomiya M, Sakai S. Identification of a principal mRNA species for human 3 $\alpha$ -hydroxysteroid dehydrogenase isoform (AKR1C3) that exhibits high prostaglandin D2 11-ketoreductase activity. *J Biochem* 1998; 124:940–946.
26. Madore E, Harvey N, Parent J, Chapdelaine P, Arosh JA, Fortier MA. An aldose reductase with 20  $\alpha$ -hydroxysteroid dehydrogenase activity is most likely the enzyme responsible for the production of prostaglandin f2  $\alpha$  in the bovine endometrium. *J Biol Chem* 2003; 278:11205–11212.
27. Kabututu Z, Manin M, Pointud JC, Maruyama T, Nagata N, Lambert S, Lefrancois-Martinez AM, Martinez A, Urade Y. Prostaglandin F2 $\alpha$  synthase activities of aldo-keto reductase 1B1, 1B3 and 1B7. *J Biochem* 2009; 145:161–168.
28. Fortier MA, Krishnaswamy K, Danyod G, Boucher-Kovalik S, Chapdelaine P. A postgenomic integrated view of prostaglandins in reproduction: implications for other body systems. *J Physiol Pharmacol* 2008; 59(suppl 1):65–89.
29. Schuster VL. Molecular mechanisms of prostaglandin transport. *Annu Rev Physiol* 1998; 60:221–242.
30. Banu SK, Arosh JA, Chapdelaine P, Fortier MA. Expression of prostaglandin transporter in the bovine uterus and fetal membranes during pregnancy. *Biol Reprod* 2005; 73:230–236.
31. Banu SK, Arosh JA, Chapdelaine P, Fortier MA. Molecular cloning and spatio-temporal expression of the prostaglandin transporter: a basis for the action of prostaglandins in the bovine reproductive system. *Proc Natl Acad Sci U S A* 2003; 100:11747–11752.
32. Kang J, Chapdelaine P, Laberge PY, Fortier MA. Functional characterization of prostaglandin transporter and terminal prostaglandin synthases during decidualization of human endometrial stromal cells. *Hum Reprod* 2006; 21:592–599.
33. Kang J, Chapdelaine P, Parent J, Madore E, Laberge PY, Fortier MA. Expression of human prostaglandin transporter in the human endometrium across the menstrual cycle. *J Clin Endocrinol Metab* 2005; 90:2308–2313.
34. Leroy MJ, Dallot E, Czerkiewicz I, Schmitz T, Breuiller-Fouche M. Inflammation of choriodecidua induces tumor necrosis factor  $\alpha$ -mediated apoptosis of human myometrial cells. *Biol Reprod* 2007; 76:769–776.
35. Oger S, Mehats C, Dallot E, Cabrol D, Leroy MJ. Evidence for a role of phosphodiesterase 4 in lipopolysaccharide-stimulated prostaglandin E2 production and matrix metalloproteinase-9 activity in human amniochorionic membranes. *J Immunol* 2005; 174:8082–8089.
36. Altschul SF, Gish W, Miller W, Myers EW, Lipman DJ. Basic local alignment search tool. *J Mol Biol* 1990; 215:403–410.
37. Helliwell RJ, Adams LF, Mitchell MD. Prostaglandin synthases: recent developments and a novel hypothesis. *Prostaglandins Leukot Essent Fatty Acids* 2004; 70:101–113.
38. Challis JR, Sloboda DM, Alfaidy N, Lye SJ, Gibb W, Patel FA, Whittle WL, Newnham JP. Prostaglandins and mechanisms of preterm birth. *Reproduction* 2002; 124:1–17.
39. Lu R, Kanai N, Bao Y, Schuster VL. Cloning, in vitro expression, and tissue distribution of a human prostaglandin transporter cDNA(hPGT). *J Clin Invest* 1996; 98:1142–1149.
40. Romero R, Espinoza J, Goncalves LF, Kusanovic JP, Friel L, Hassan S. The role of inflammation and infection in preterm birth. *Semin Reprod Med* 2007; 25:21–39.
41. Elovitz MA, Mrinalini C. Animal models of preterm birth. *Trends Endocrinol Metab* 2004; 15:479–487.
42. Denison FC, Kelly RW, Calder AA, Riley SC. Cytokine secretion by human fetal membranes, decidua and placenta at term. *Hum Reprod* 1998; 13:3560–3565.
43. Zaga V, Estrada-Gutierrez G, Beltran-Montoya J, Maida-Claros R, Lopez-Vancell R, Vellido-Ortega F. Secretions of interleukin-1 $\beta$  and tumor necrosis factor  $\alpha$  by whole fetal membranes depend on initial interactions of amnion or choriodecidua with lipopolysaccharides or group B streptococci. *Biol Reprod* 2004; 71:1296–1302.
44. Arntzen KJ, Egeberg K, Rahimipour S, Vatten L, Austgulen R. LPS mediated production of IL-1, PGE2 and PGF2 $\alpha$  from term decidua involves tumour necrosis factor and tumour necrosis factor receptor p55. *J Reprod Immunol* 1999; 45:113–125.
45. Lappas M, Permezel M, Rice GE. Mitogen-activated protein kinase proteins regulate LPS-stimulated release of pro-inflammatory cytokines and prostaglandins from human gestational tissues. *Placenta* 2007; 28:936–945.
46. Sato TA, Mitchell MD. Contact paracrine inhibitory networks within human gestational tissues. *Am J Obstet Gynecol* 2006; 195:1396–1397.
